# Supplementary material
Source: MDPI journal article supplement (https://www.mdpi.com/2072-4292/13/6/1066)
Supplement: s1 [file s1]

**Table S1.** Criteria used to prescribe suitable areas for shifting cultivation of staple crops along with cash crops and vegetables.

| <b>Crop Type</b> | <b>Crop Name</b> | <b>Soil Type</b>                          | <b>pH</b> | <b>Precipitation</b> | <b>Temperature</b> |
|------------------|------------------|-------------------------------------------|-----------|----------------------|--------------------|
| Food Grains      | Rice             | Riverine alluvial                         | 4–8       | >100 cm              | 25–35°C            |
|                  | Maize            | Sandy loam, Clay loam                     | 6–7       | 60–110 cm            | 18–27°C            |
|                  | Millet           | Clay, Clay loam, or Sandy loam            | 4–8       | 35–50 cm             | 26–29°C            |
|                  | Small Millets    | Sandy loam to Clays of black cotton soils | 4–8       | 35–50 cm             | 26–29°C            |
| Cash Crops       | Cotton           | Sandy loam                                | 5.8–8     | 60–100 cm            | 21–37°C            |
|                  | Ginger           | Sandy                                     | 5.5–6.5   | 132–152 cm           | 21–27°C            |
|                  | Pineapple        | Sandy loam                                | 4.5–6.5   | 55–55 cm             | 20–30°C            |
|                  | Jute             | Alluvial or Loamy                         | 6–7.5     | 160–200 cm           | 17–41°C            |
| Vegetables       | Soybean          | Loamy                                     | 6.3–6.5   | 60–65 cm             | 12–15°C            |
|                  | Potato           | Loamy                                     | 4.8–5.5   | 120–200 cm           | 15–21°C            |
|                  | Pumpkin          | Sandy loam                                | 5.5–7.5   | –                    | 20–30°C            |
|                  | Cucumbers        | Loamy                                     | 6–7       | –                    | 18–23°C            |
|                  | Beans            | Sandy and Silty loam                      | 6.0–6.5   | 35–50 cm             | 10–21°C            |
|                  | Onion            | Loamy                                     | 5.5–6.5   | 65–75 cm             | 20 – 25°C          |

Source: Vikaspedia (<https://vikaspedia.in/agriculture/crop-production/technologies-for-ne-india/rice-seed-production/>, last visited 20th September 2020), Agricare(<https://agricare.kisanhelp.in/>, last assessed on 20th September 2020)
